# Supplementary material for: Hepatitis A Seroprevalence Among HIV-Exposed and Unexposed Paediatric Populations in South Africa
Source: Preprints.org preprint supplement (doi:10.20944/preprints202410.0968.v1), 2024-10-15
Supplement: Supplementary file 1 [file supplementary]

**Supplementary table 2**. Maternal socio- demographic and economic characteristics stratified by participants’ HIV exposure and infection status

|  | Total  N=513 (%) | HIV1  n=19 (%) | HEU2  n=74 (%) | HIV-E3  n=8 (%) | HUU4  n=412 (%) | | |
| --- | --- | --- | --- | --- | --- | --- | --- |
| Age (years) | | | | | | |
| *Median Age (IQR)* | 29 (25**,** 34) | 29 (26, 34) | 32 (26, 34) | 31 (27, 37) | 28 (24, 34) | | |
| *Teen (15 – 19)* | 33 (6.4%) | — | 4 (5.4%) | — | 29 (7.0%) | | |
| *Young (20 – 21)* | 32 (6.2%) | — | 3 (4.1%) | 1 (12.5%) | 28 (6.8%) | | |
| *Adult (22 – 51)* | 448 (87.3%) | 19 (100%) | 67 (90.5%) | 7 (87.5%) | 355 (86.2%) | | |
| Education level | | | | | |
| *Primary* | 20 (3.9%) | — | 4 (5.4%) | 1 (12.5%) | 15 (3.6%) | | |
| *Secondary* | 460 (89.7%) | 19 (100%) | 67 (90.5%) | 5 (62.5%) | 369 (89.6%) | | |
| *Highest basic school grade unknown5* | 18 (3.5%) | — | 2 (2.7%) | 2 (25.0%) | 14 (3.4%) | | |
| *Tertiary* | 15 (2.9%) | — | 1 (1.4%) | — | 14 (3.4%) | | |
| Type of dwelling | | | | | | | |
| *Bricks* | 298 (58.1%) | 7 (36.8%) | 25 (33.8%) | 2 (25.0%) | 264 (64.1%) | | |
| *Shack (tin/zinc/iron sheeting)* | 196 (38.2%) | 12 (63.2%) | 46 (62.2%) | 6 (75.0%) | 132 (32.0%) | | |
| *Wood or Wendy house* | 16 (3.1%) | — | 3 (4.1%) | — | 13 (3.2%) | | |
| *Unknown6* | 3 (0.6%) | — | — | — | 3 (0.7%) | | |
| Water source | | | | | |
| *In-door tap* | 239 (46.6%) | 5 (26.3%) | 18 (24.3%) | 1 (12.5%) | 214 (51.9%) | | |
| *Outdoor communal tap* | 110 (21.4%) | 3 (15.8%) | 26 (35.1%) | 2 (25.0%) | 80 (19.4%) | | |
| *Borehole* | 164 (32.0%) | 11 (57.9%) | 30 (40.5%) | 5 (62.5%) | 118 (28.6%) | | |
| Type of toilet | | | | | |
| *Flush toilet* | 435 (84.8%) | 16 (84.2%) | 54 (73.0%) | 6 (75.0%) | 359 (87.1%) | | |
| *Bucket* | 8 (1.6%) | — | 2 (2.7%) | 1 (12.5%) | 5 (1.2%) | | |
| *Pit latrine* | 67 (13.1%) | 3 (15.8%) | 17 (23.0%) | 1 (12.5%) | 46 (11.2%) | | |
| *Unknown6* | 3 (0.6%) | — | 1 (1.4%) | — | 2 (0.5%) | | |
| Socio-economic quartiles7 | | | | | | | |
| *Low* | 104 (20.3%) | 4 (21.1%) | 20 (27.0%) | 2 (25.0%) | 78 (18.9%) | | |
| *Lower-middle* | 34 (6.6%) | — | 1 (1.4%) | 1 (12.5%) | 32 (7.8%) | | |
| *Upper-middle* | 247 (48.1%) | 11 (57.9%) | 36 (48.6%) | 3 (37.5%) | 197 (47.8%) | | |
| *High* | 64 (12.5%) | 2 (10.5%) | 10 (13.5%) | — | 52 (12.6%) | | |
| *Unknown6* | 64 (12.5%) | 2 (10.5%) | 7 (9.5%) | 2 (25.0%) | 53 (12.9%) | | |

*1Children living with HIV; 2HIV-exposed uninfected; 3HIV-exposed but child infection status unknown; 4HIV-unexposed uninfected; 5missing data; 5participants indicated having received a basic education (primary or secondary) however highest grade attained was not recorded;* *6missing data; 7socio-economic status was categorized into quartiles based on a validated weighted composite score that included maternal asset ownership, employment, and education*
